# Supplementary material
Source: publisher figshare collection journal article supplement (https://acs.figshare.com/ndownloader/files/4087714)
Supplement: Supplementary file 1 [file 4087714]

# Supporting Information

## In-situ Aggregation of ZnSe Nanoparticles into Supraparticles: Shape Control and Doping Effects

*Gaoling Yang,<sup>†</sup> Haizheng Zhong,<sup>\*†</sup> Ruibin Liu,<sup>†</sup> Yongfang Li,<sup>‡</sup> and Bingsuo Zou<sup>†</sup>*

<sup>†</sup> Beijing Key Laboratory of Nanophotonics and Ultrafine Optoelectronic Systems, School of Materials Science & Engineering, Beijing Institute of Technology, 5 Zhongguancun South Street, Haidian District, Beijing, 100081, China

<sup>‡</sup> CAS Key Laboratory of Organic Solids, Institute of Chemistry, Chinese Academy of Sciences, Beijing 100190, China

**Table S1.** The result of ICP-AES measurements for magnetic Fe<sub>3</sub>O<sub>4</sub>@ZnSe SPs.

| Sample | Zn Concentration<br>(g/ml) | ZnSe/(ZnSe+Fe <sub>3</sub> O <sub>4</sub> )<br>molar ratio | Fe Concentration<br>(g/ml) | Fe <sub>3</sub> O <sub>4</sub> /(ZnSe+Fe <sub>3</sub> O <sub>4</sub> )<br>molar ratio |
|--------|----------------------------|------------------------------------------------------------|----------------------------|---------------------------------------------------------------------------------------|
| 1      | 2.26                       | 87                                                         | 0.681                      | 13                                                                                    |
| 2      | 1.10                       | 73                                                         | 0.594                      | 27                                                                                    |

**Figures:**

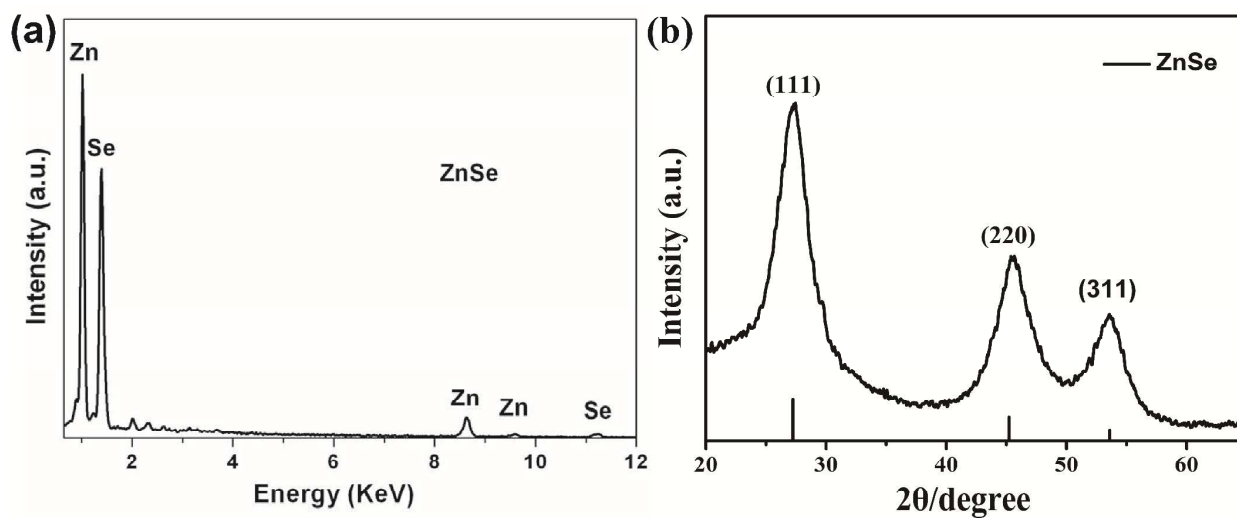

**Figure S1.** (a) EDS and (b) XRD spectrum of ZnSe SPs.

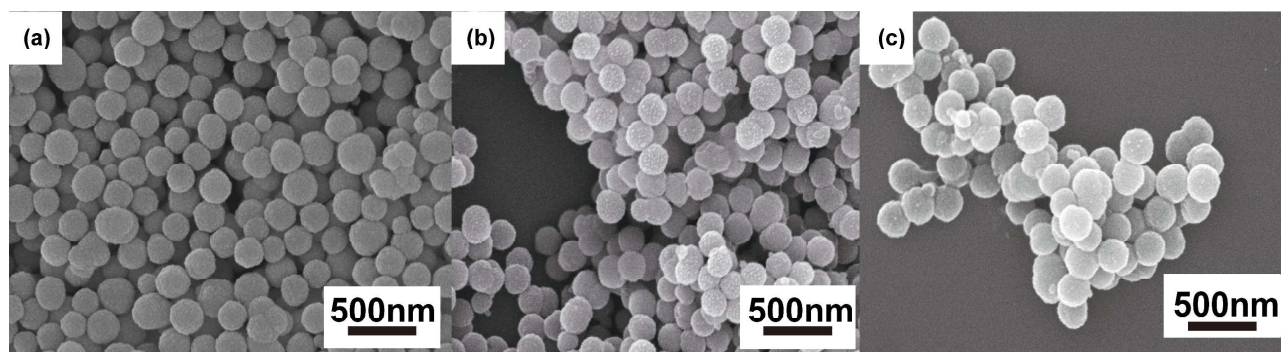

**Figure S2.** SEM images of magnetic  $\text{Fe}_3\text{O}_4@\text{ZnSe}$  SPs with  $\text{Fe}_3\text{O}_4/(\text{ZnSe}+\text{Fe}_3\text{O}_4)$  molar ratio of (a) 0%, (b) 13% and (c) 27%.

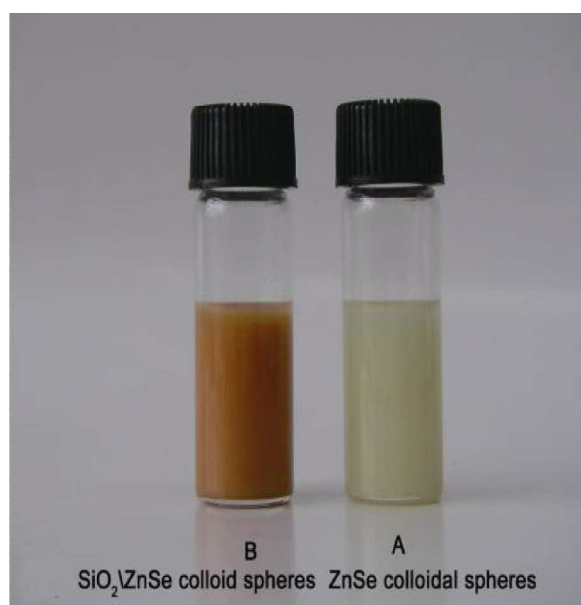

**Figure S3.** Photograph of ZnSe SPs and  $\text{SiO}_2@\text{ZnSe}$  SPs.

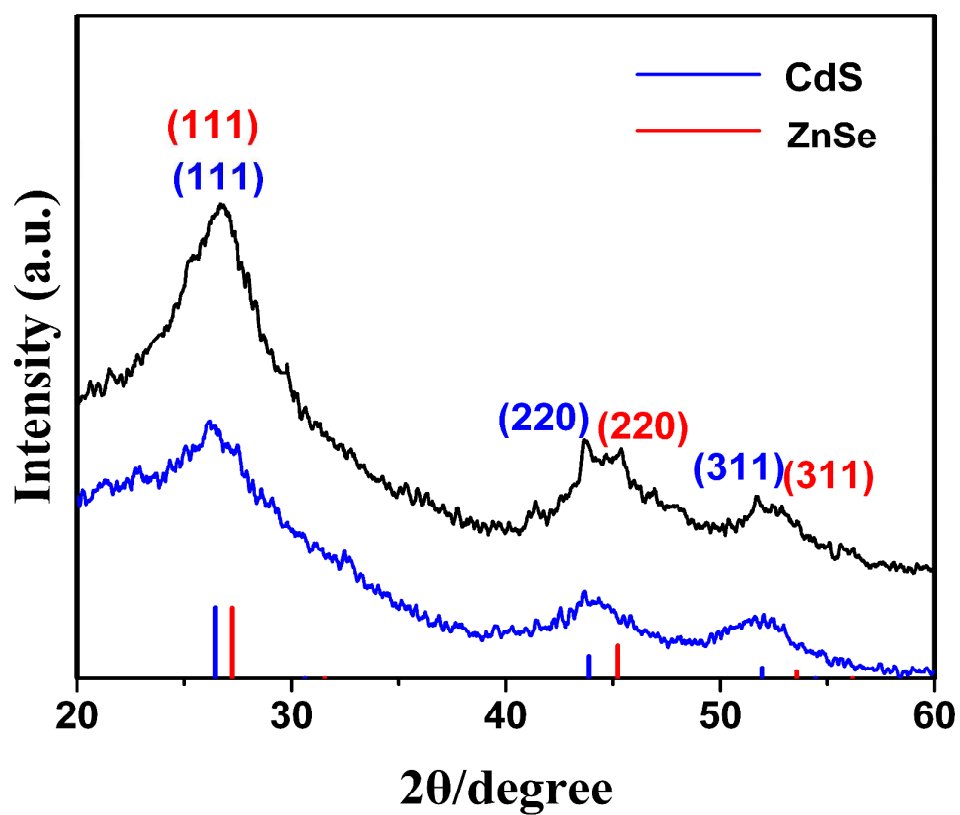

**Figure S4.** XRD patterns of CdS NPs (black line) and CdS@ZnSe SPs (blue line) and their corresponding standard patterns.
